# Supplementary material for: Chemical analysis of Chang'e-5 lunar soil using LA-ICP-MS in highly diluted fused glass discs
Source: Royal Society of Chemistry journal article supplement (doi:10.1039/d4ja00329b), 2024-10-31
Supplement: d4ja00329b1.pdf [file d4ja00329b1.pdf]

---

Supporting Information to:

## **Chemical analysis of Chang'e-5 lunar soil using LA–ICP–MS in highly diluted fused glass discs**

Shitou Wu<sup>1,2,\*</sup>, Dingshuai Xue<sup>1,2</sup>, Yueheng Yang<sup>1,2</sup>, Hao Wang<sup>1,2</sup>, Chunlai Li<sup>3</sup> and Fuyuan Wu<sup>1,2</sup>

1. State Key Laboratory of Lithospheric and Environmental Coevolution, Institute of Geology and Geophysics, Chinese Academy of Sciences, Beijing, 100029, P.R. China
2. College of Earth and Planetary Science, University of Chinese Academy of Sciences, Beijing, 100049, P.R. China
3. Key Laboratory of Lunar and Deep Space Exploration, National Astronomical Observatories, Chinese Academy of Sciences, 100101, Beijing, P.R. China

Corresponding author E-mail address: [shitou.wu@mail.iggcas.ac.cn](mailto:shitou.wu@mail.iggcas.ac.cn);

This supporting information material includes the detail sample information, the preparation of highly diluted fused glass discs, and the LA–ICP–MS analysis. Table S1-S4 and Figure S1-S5 and the reference list were listed in this material as well.

---

**Sample information.**

The CE-5 lunar sample analyzed is CE5C0800YJFM002 obtained from China's CE-5 mission to the mid-latitude region in the northeastern Oceanus Procellarum on the Moon. The physical and chemical properties have been reported in previous studies<sup>1-5</sup>. The CE-5 lunar samples are composed mostly of basalt, impact glass, agglutinates, and mineral fragments. The basalts can be classified as low-Ti and highly fractionated based on their TiO<sub>2</sub> contents (~5.3 wt.%) and Mg# (~28), and have an age of  $2030 \pm 4$  Ma<sup>2,5,6</sup>. A total of 30 mg of the sample was weighed accurately for LA-ICP-MS analysis. Two certified basaltic standards produced by the United States Geological Survey (BCR-2 and BHVO-1) were used for quality control. The recommended values of these two standards were taken from GeoReM (Version 35; <http://georem.mpch-mainz.gwdg.de/>).<sup>7</sup>

**Preparation of highly diluted fused glass discs (flux:sample = 100:1).** Pre-mixed anhydrous lithium borate powder (67% lithium tetraborate, 33% lithium metaborate; Claisse, Quebec, Canada) was used as flux to prepare the glass discs. Ammonium bromide ( $\geq 99.0\%$ , ACS reagent) was purchased from Sinopharm Chemical Reagent Company (Shanghai, China) as an exfoliation agent. The sample powder and flux were dried in an oven at 110 °C for 24 hours. The dried samples and flux were then cooled to room temperature and placed in a glass desiccator before being weighted. Flux ( $3000.0 \pm 0.2$  mg) and sample ( $30.0 \pm 0.1$  mg) powders were weighed in sequence into a Pt-Au crucible. The flux and sample were mixed well using a glass rod and 0.15 mL aqueous ammonium bromide solution ( $0.12 \text{ g mL}^{-1}$ ) was added as an exfoliation agent. The glass discs were prepared following Xue et al.<sup>8</sup> (Program 3 of the M4 automatic fluxer). Due to the small sample size, the discs needed to be prepared by hand during the final stage of the fusion cycle (Figure 1). The major-element composition of the fused CE-5 glass disc was previously analyzed by X-ray fluorescence spectrometer (XRF)<sup>1</sup>.

**LA-ICP-MS analysis.** Elemental abundances in the fused glass discs were determined by LA-ICP-MS using an Element XR high-resolution ICP-MS instrument (Thermo Fisher Scientific, USA) coupled to a 193 nm ArF excimer laser system (GeoLas HD, Lambda Physik, Göttingen, Germany) at the State Key Laboratory of Lithospheric and Environmental Coevolution, Institute of Geology and Geophysics, Chinese Academy of Sciences, Beijing, China. The approach was similar to that outlined by Wu et al.<sup>9</sup>, with isotopes measured using peak-hopping mode. The instrument parameters are listed

---

in Table S1. To improve the instrument sensitivity, a modified Jet sample cone (orifice diameter enlarge from 1.1 mm to 1.2 mm) were used. Helium was used as the ablation gas to improve the transport efficiency for the ablated aerosols. ARM-2 reference glass was used for external calibration<sup>9</sup>,<sup>10</sup> and highly diluted fused BCR-2 and BHVO-1 glass discs were used for quality control. To further simplification of the quantification procedure, we used the bulk normalization strategy based on  $\text{Li}_2\text{O}$ ,  $\text{B}_2\text{O}_3$ ,  $\text{SiO}_2$ ,  $\text{TiO}_2$ ,  $\text{Al}_2\text{O}_3$ ,  $\text{FeO}$ ,  $\text{MnO}$ ,  $\text{MgO}$ ,  $\text{CaO}$ ,  $\text{K}_2\text{O}$ , and  $\text{P}_2\text{O}_5$  as 100 wt% for data processing. With this approach, it is not required for a known internal standard (e.g., Si and Ca) for standardization. The data were reduced using Iolite software<sup>11</sup> with an in house built DRS<sup>12</sup>.

Table S1 Typical LA–SF–ICP–MS instrumental conditions.

|                                    |                                                                                                                                                                                                                                                                                                                                                                                                                                                                                                                                                                                                                                                                                                                                                                                                                                                                                                                                                                                                                                                                                               |
|------------------------------------|-----------------------------------------------------------------------------------------------------------------------------------------------------------------------------------------------------------------------------------------------------------------------------------------------------------------------------------------------------------------------------------------------------------------------------------------------------------------------------------------------------------------------------------------------------------------------------------------------------------------------------------------------------------------------------------------------------------------------------------------------------------------------------------------------------------------------------------------------------------------------------------------------------------------------------------------------------------------------------------------------------------------------------------------------------------------------------------------------|
| <b>Laser ablation system</b>       |                                                                                                                                                                                                                                                                                                                                                                                                                                                                                                                                                                                                                                                                                                                                                                                                                                                                                                                                                                                                                                                                                               |
| Make, model, and type              | Coherent, GeoLas HD                                                                                                                                                                                                                                                                                                                                                                                                                                                                                                                                                                                                                                                                                                                                                                                                                                                                                                                                                                                                                                                                           |
| Ablation cell                      | In-house cell, aerosol dispersion volume <3 cm <sup>3</sup>                                                                                                                                                                                                                                                                                                                                                                                                                                                                                                                                                                                                                                                                                                                                                                                                                                                                                                                                                                                                                                   |
| Laser wavelength                   | 193 nm                                                                                                                                                                                                                                                                                                                                                                                                                                                                                                                                                                                                                                                                                                                                                                                                                                                                                                                                                                                                                                                                                        |
| Pulse duration                     | 20 ns                                                                                                                                                                                                                                                                                                                                                                                                                                                                                                                                                                                                                                                                                                                                                                                                                                                                                                                                                                                                                                                                                         |
| Energy density                     | 8.0 J cm <sup>-2</sup>                                                                                                                                                                                                                                                                                                                                                                                                                                                                                                                                                                                                                                                                                                                                                                                                                                                                                                                                                                                                                                                                        |
| Repetition rate                    | 10 Hz                                                                                                                                                                                                                                                                                                                                                                                                                                                                                                                                                                                                                                                                                                                                                                                                                                                                                                                                                                                                                                                                                         |
| Spot size                          | 90 μm                                                                                                                                                                                                                                                                                                                                                                                                                                                                                                                                                                                                                                                                                                                                                                                                                                                                                                                                                                                                                                                                                         |
| Sampling mode                      | Single hole drilling, with two cleaning pulses                                                                                                                                                                                                                                                                                                                                                                                                                                                                                                                                                                                                                                                                                                                                                                                                                                                                                                                                                                                                                                                |
| Ablation gas flow                  | 0.75 L min <sup>-1</sup> (He)                                                                                                                                                                                                                                                                                                                                                                                                                                                                                                                                                                                                                                                                                                                                                                                                                                                                                                                                                                                                                                                                 |
| Ablation duration                  | 50s                                                                                                                                                                                                                                                                                                                                                                                                                                                                                                                                                                                                                                                                                                                                                                                                                                                                                                                                                                                                                                                                                           |
| <b>ICP–MS instrument</b>           |                                                                                                                                                                                                                                                                                                                                                                                                                                                                                                                                                                                                                                                                                                                                                                                                                                                                                                                                                                                                                                                                                               |
| Make, model, and type              | Thermo Fisher Scientific Element XR                                                                                                                                                                                                                                                                                                                                                                                                                                                                                                                                                                                                                                                                                                                                                                                                                                                                                                                                                                                                                                                           |
| Radio frequency power              | 1320 W                                                                                                                                                                                                                                                                                                                                                                                                                                                                                                                                                                                                                                                                                                                                                                                                                                                                                                                                                                                                                                                                                        |
| Guard electrode                    | Disconnected                                                                                                                                                                                                                                                                                                                                                                                                                                                                                                                                                                                                                                                                                                                                                                                                                                                                                                                                                                                                                                                                                  |
| Cone combinations                  | Standard sampler + H version skimmer (Nickel)                                                                                                                                                                                                                                                                                                                                                                                                                                                                                                                                                                                                                                                                                                                                                                                                                                                                                                                                                                                                                                                 |
| Fore vacuum P (mbar)               | 1.8×10 <sup>-3</sup> (S + H)                                                                                                                                                                                                                                                                                                                                                                                                                                                                                                                                                                                                                                                                                                                                                                                                                                                                                                                                                                                                                                                                  |
| High vacuum P (mbar)               | 2.0×10 <sup>-7</sup> (S + H)                                                                                                                                                                                                                                                                                                                                                                                                                                                                                                                                                                                                                                                                                                                                                                                                                                                                                                                                                                                                                                                                  |
| Coolant gas flow (Ar)              | 15.00 l min <sup>-1</sup>                                                                                                                                                                                                                                                                                                                                                                                                                                                                                                                                                                                                                                                                                                                                                                                                                                                                                                                                                                                                                                                                     |
| Auxiliary gas flow (Ar)            | 0.80 l min <sup>-1</sup>                                                                                                                                                                                                                                                                                                                                                                                                                                                                                                                                                                                                                                                                                                                                                                                                                                                                                                                                                                                                                                                                      |
| Carrier gas flow (Ar)              | 0.95 l min <sup>-1</sup>                                                                                                                                                                                                                                                                                                                                                                                                                                                                                                                                                                                                                                                                                                                                                                                                                                                                                                                                                                                                                                                                      |
| Scan mode                          | E-scan                                                                                                                                                                                                                                                                                                                                                                                                                                                                                                                                                                                                                                                                                                                                                                                                                                                                                                                                                                                                                                                                                        |
| Isotopes measured (dwell time)     | <sup>7</sup> Li (10 ms), <sup>11</sup> B (10 ms), <sup>24</sup> Mg (10 ms), <sup>27</sup> Al (10 ms), <sup>30</sup> Si (10 ms), <sup>31</sup> P (10 ms), <sup>39</sup> K (10 ms), <sup>44</sup> Ca (10 ms), <sup>45</sup> Sc (10 ms), <sup>49</sup> Ti (10 ms), <sup>55</sup> Mn (10 ms), <sup>59</sup> Co (10 ms), <sup>60</sup> Ni (10 ms), <sup>71</sup> Ga (10 ms), <sup>85</sup> Rb (10 ms), <sup>88</sup> Sr (10 ms), <sup>89</sup> Y (10 ms), <sup>90</sup> Zr (10 ms), <sup>93</sup> Nb (10 ms), <sup>133</sup> Cs (10 ms), <sup>137</sup> Ba (10 ms), <sup>139</sup> La (10 ms), <sup>140</sup> Ce (10 ms), <sup>141</sup> Pr (10 ms), <sup>146</sup> Nd (10 ms), <sup>147</sup> Sm (10 ms), <sup>153</sup> Eu (10 ms), <sup>158</sup> Gd (10 ms), <sup>159</sup> Gd (10 ms), <sup>163</sup> Tb (10 ms), <sup>165</sup> Ho (10 ms), <sup>166</sup> Er (10 ms), <sup>169</sup> Tm (10 ms), <sup>173</sup> Yb (10 ms), <sup>175</sup> Lu (10 ms), <sup>177</sup> Hf (10 ms), <sup>181</sup> Ta (10 ms), <sup>208</sup> Pb (10 ms), <sup>232</sup> Th (10 ms), <sup>238</sup> U (10 ms) |
| Mass window                        | 20%                                                                                                                                                                                                                                                                                                                                                                                                                                                                                                                                                                                                                                                                                                                                                                                                                                                                                                                                                                                                                                                                                           |
| Samples per peak                   | 20                                                                                                                                                                                                                                                                                                                                                                                                                                                                                                                                                                                                                                                                                                                                                                                                                                                                                                                                                                                                                                                                                            |
| Detection system                   | Single secondary electron multiplier in triple mode, ion counter, analogue, and Faraday cups                                                                                                                                                                                                                                                                                                                                                                                                                                                                                                                                                                                                                                                                                                                                                                                                                                                                                                                                                                                                  |
| Resolution                         | m/Δm = 300                                                                                                                                                                                                                                                                                                                                                                                                                                                                                                                                                                                                                                                                                                                                                                                                                                                                                                                                                                                                                                                                                    |
| Total integration time per reading | 0.38 s                                                                                                                                                                                                                                                                                                                                                                                                                                                                                                                                                                                                                                                                                                                                                                                                                                                                                                                                                                                                                                                                                        |

Table S2 The potential Li-, B-, O-, and Ar-based polyatomic interferences on the targeted isotopes

|                   | Li, B, O and Ar based polyatomic ions                             |                                    | Flux reagent impurities |
|-------------------|-------------------------------------------------------------------|------------------------------------|-------------------------|
|                   | Monovalent ions                                                   | Divalent ions                      |                         |
| $^{24}\text{Mg}$  |                                                                   | $^{10}\text{B}^{38}\text{Ar}^{2+}$ | Amount                  |
| $^{27}\text{Al}$  | $^{11}\text{B}^{16}\text{O}^+$                                    |                                    | Amount                  |
| $^{29}\text{Si}$  | $^{11}\text{B}^{18}\text{O}^+$                                    |                                    | Amount                  |
| $^{30}\text{Si}$  |                                                                   |                                    | Amount                  |
| $^{31}\text{P}$   |                                                                   |                                    | Significant             |
| $^{39}\text{K}$   |                                                                   |                                    | Limited                 |
| $^{43}\text{Ca}$  | $^7\text{Li}^{36}\text{Ar}^+$                                     |                                    | Amount                  |
| $^{44}\text{Ca}$  |                                                                   |                                    | Amount                  |
| $^{45}\text{Sc}$  | $^7\text{Li}^{38}\text{Ar}^+$                                     |                                    | Limited                 |
| $^{47}\text{Ti}$  | $^7\text{Li}^{40}\text{Ar}^+$ , $^{11}\text{B}^{36}\text{Ar}^+$   |                                    | Limited                 |
| $^{49}\text{Ti}$  | $^{11}\text{B}^{38}\text{Ar}^+$ , $^{11}\text{B}^{40}\text{Ar}^+$ |                                    | Limited                 |
| $^{57}\text{Fe}$  |                                                                   |                                    | Limited                 |
| $^{66}\text{Zn}$  | $^{10}\text{B}^{16}\text{O}^{40}\text{Ar}^+$                      |                                    | Limited                 |
| $^{66}\text{Zn}$  |                                                                   |                                    | Limited                 |
| $^{71}\text{Ga}$  |                                                                   |                                    | Amount                  |
| $^{886}\text{Sr}$ |                                                                   |                                    | Amount                  |
| $^{137}\text{Ba}$ |                                                                   |                                    | Amount                  |
| $^{208}\text{Pb}$ |                                                                   |                                    | Amount                  |

Table S3 The limit of detections (LODs) of 38 elements of our technique were calculated based on the protocol by Pettke et al. (2012)<sup>12</sup>

| Element | LODs ( $\mu\text{g g}^{-1}$ ) |
|---------|-------------------------------|
| K       | 76                            |
| Sc      | 3.6                           |
| Mn      | 14                            |
| Co      | 0.98                          |
| Ni      | 32                            |
| Ga      | 7.8                           |
| Rb      | 0.52                          |
| Sr      | 1.8                           |
| Y       | 0.21                          |
| Zr      | 3.3                           |
| Nb      | 0.37                          |
| Cs      | 0.16                          |
| Ba      | 1.1                           |
| La      | 0.12                          |
| Ce      | 0.09                          |
| Pr      | 0.09                          |
| Nd      | 0.33                          |
| Sm      | 0.51                          |
| Eu      | 0.18                          |
| Gd      | 0.19                          |
| Tb      | 0.11                          |
| Dy      | 0.16                          |
| Ho      | 0.08                          |
| Er      | 0.12                          |
| Tm      | 0.08                          |
| Yb      | 0.54                          |
| Lu      | 0.08                          |
| Hf      | 0.25                          |
| Ta      | 0.12                          |
| Pb      | 0.13                          |
| Th      | 0.18                          |
| U       | 0.03                          |

Table S4 Trace element data of BCR-2 and BHVO-1. The reference values of these two materials were listed for comparison.

| □                              | BCR-2    |       |       |       | BHVO-1   |       |       |       |
|--------------------------------|----------|-------|-------|-------|----------|-------|-------|-------|
|                                | Ref.val. | 2s    | Mean  | SD    | Ref.val. | 2s    | Mean  | SD    |
| SiO <sub>2</sub>               | 54.0     | 0.2   | 53.9  | 1.0   | 49.6     | 0.1   | 49.6  | 0.9   |
| TiO <sub>2</sub>               | 2.27     | 0.02  | 2.27  | 0.05  | 2.73     | 0.02  | 2.72  | 0.06  |
| Al <sub>2</sub> O <sub>3</sub> | 13.5     | 0.1   | 13.6  | 0.8   | 13.4     | 0.06  | 13.4  | 0.6   |
| FeO                            | 12.4     | 0.2   | 12.3  | 0.5   | 11.3     | 0.2   | 11.5  | 0.6   |
| MnO                            | 0.197    | 0.003 | 0.202 | 0.006 | 0.169    | 0.002 | 0.164 | 0.003 |
| MgO                            | 3.60     | 0.04  | 3.54  | 0.12  | 7.26     | 0.04  | 7.17  | 0.12  |
| CaO                            | 7.11     | 0.08  | 6.98  | 0.39  | 11.4     | 0.1   | 11.5  | 0.6   |
| K <sub>2</sub> O               | 1.77     | 0.02  | 1.72  | 0.06  | 0.513    | 0.004 | 0.529 | 0.008 |
| P <sub>2</sub> O <sub>5</sub>  | 0.359    | 0.010 | -     | -     | 0.359    | 0.010 | -     | -     |
| Sc                             | 33.5     | 0.4   | 34.2  | 1.5   | 31.8     | 0.3   | 33.5  | 3.4   |
| Co                             | 37.3     | 0.4   | 40.3  | 2.1   | 44.9     | 0.3   | 43.7  | 3.7   |
| Ni                             | 12.57    | 0.3   | 11.7  | 2.0   | 120      | 1     | 111   | 14    |
| Ga                             | 22.1     | 0.2   | 20.7  | 1.4   | 21.3     | 0.2   | 22.2  | 3.9   |
| Rb                             | 46.0     | 0.5   | 38.8  | 3.3   | 9.26     | 0.10  | 8.04  | 1.04  |
| Sr                             | 337      | 7     | 363   | 7     | 394      | 2     | 406   | 7     |
| Y                              | 36.1     | 0.4   | 34.4  | 2.3   | 25.9     | 0.3   | 24.2  | 2.0   |
| Zr                             | 187      | 2     | 181   | 11    | 171      | 1     | 165   | 1     |
| Nb                             | 12.4     | 0.2   | 13.5  | 3.9   | 18.1     | 0.2   | 16.7  | 1.6   |
| Cs                             | 1.16     | 0.02  | 0.92  | 0.23  | 0.100    | 0.002 | 1.66  | 3.29  |
| Ba                             | 684      | 5     | 734   | 29    | 131      | 1     | 128   | 15    |
| La                             | 25.1     | 0.2   | 25.5  | 1.0   | 15.2     | 0.1   | 14.4  | 0.5   |
| Ce                             | 53.1     | 0.3   | 47.7  | 1.8   | 37.53    | 0.19  | 34.4  | 2.4   |
| Pr                             | 6.83     | 0.04  | 6.68  | 0.63  | 5.34     | 0.03  | 4.87  | 0.55  |
| Nd                             | 28.3     | 0.4   | 30.2  | 2.2   | 24.3     | 0.3   | 24.0  | 2.9   |
| Sm                             | 6.55     | 0.05  | 7.07  | 1.81  | 6.02     | 0.06  | 5.48  | 1.78  |
| Eu                             | 1.99     | 0.02  | 1.89  | 0.38  | 2.04     | 0.01  | 2.05  | 0.24  |
| Gd                             | 6.81     | 0.08  | 6.31  | 0.73  | 6.21     | 0.04  | 5.57  | 0.87  |
| Tb                             | 1.08     | 0.03  | 1.01  | 0.13  | 0.939    | 0.006 | 0.96  | 0.17  |
| Dy                             | 6.42     | 0.06  | 6.25  | 0.88  | 5.28     | 0.03  | 5.47  | 0.17  |
| Ho                             | 1.31     | 0.01  | 1.51  | 0.17  | 0.989    | 0.005 | 1.04  | 0.19  |
| Er                             | 3.67     | 0.04  | 3.95  | 0.61  | 2.51     | 0.01  | 2.36  | 0.38  |
| Tm                             | 0.534    | 0.006 | 0.54  | 0.21  | 0.335    | 0.003 | 0.330 | 0.140 |
| Yb                             | 3.39     | 0.04  | 3.18  | 1.04  | 1.99     | 0.03  | 1.59  | 0.61  |
| Lu                             | 0.505    | 0.008 | 0.400 | 0.060 | 0.275    | 0.002 | 0.390 | 0.090 |
| Hf                             | 4.97     | 0.03  | 5.67  | 0.48  | 4.47     | 0.03  | 4.65  | 1.25  |
| Ta                             | 0.785    | 0.018 | 0.750 | 0.110 | 1.15     | 0.02  | 1.38  | 0.36  |
| Pb                             | 10.6     | 0.2   | 13.7  | 2.3   | 1.65     | 0.04  | 1.73  | 0.3   |
| Th                             | 5.83     | 0.05  | 6.28  | 1.11  | 1.22     | 0.02  | 1.40  | 0.48  |
| U                              | 1.68     | 0.02  | 1.57  | 0.08  | 0.412    | 0.035 | 0.450 | 0.160 |

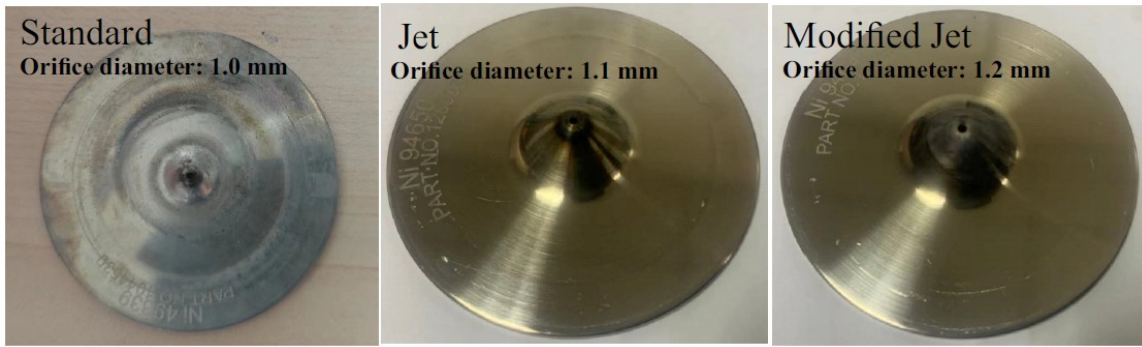

Figure S1 Exterior comparison of the Standard cone, Jet cone and modified Jet cones



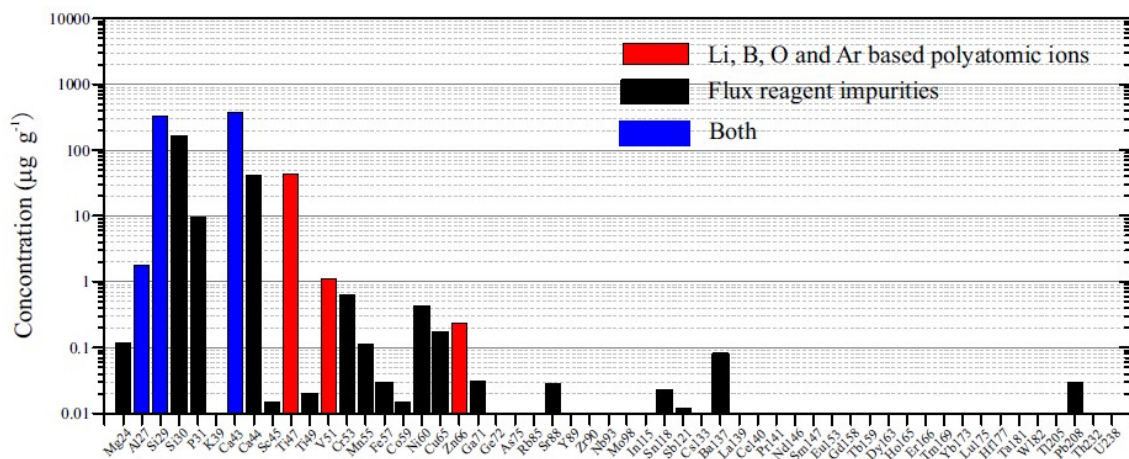

Figure S2 Identified interferences from lithium borate disks. The interferences were divided in two groups:(1) impurities in the reagent and contamination during preparation, and (2) Li-, B-, O-, and Ar-based polyatomic ions.

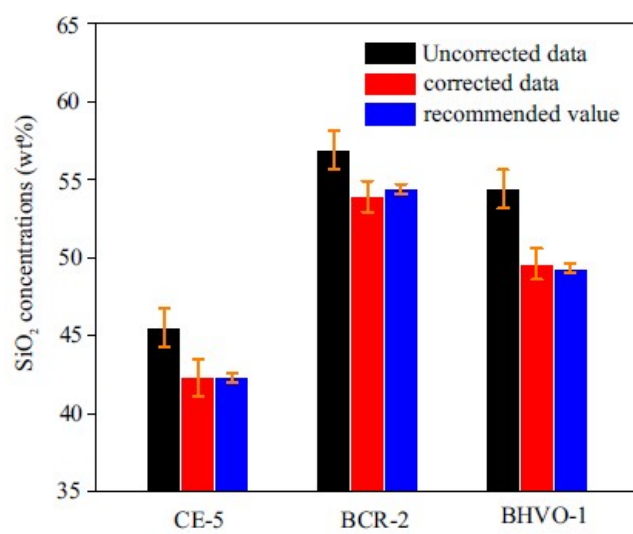

Figure S3. Comparison the interference-corrected and uncorrected SiO results of CE-5, BCR-2 and BHVO-1

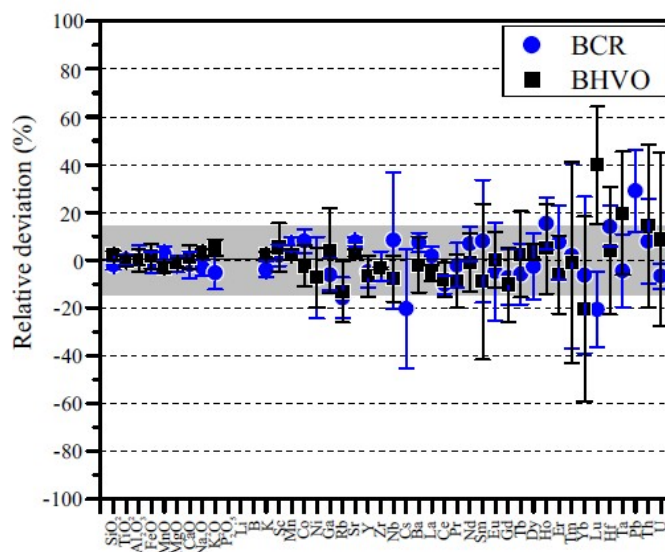

Figure S4. The analytical accuracy of BCR-2 and BHVO-1 glass disc. Relative deviations are given as  $100 \times (\text{measured value} - \text{reference value})/\text{reference value}$ .

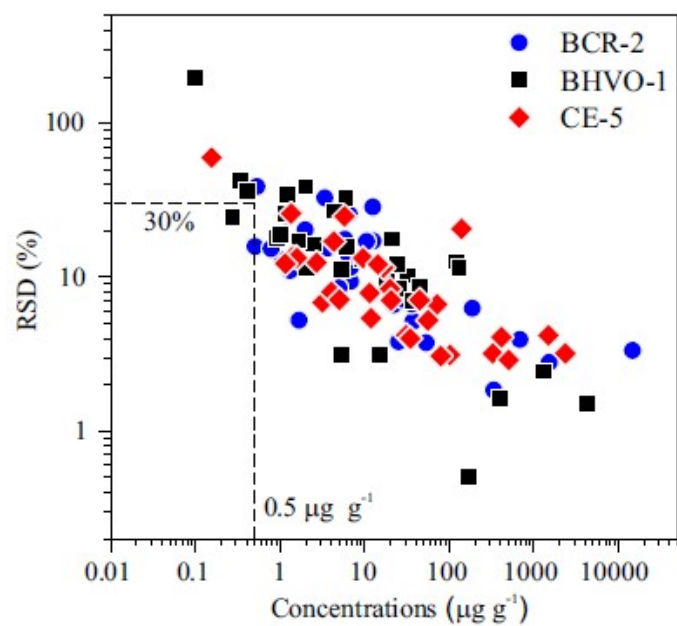

Figure S5. The analytical precision as function of elemental concentrations. The analytical precision is given as the relative standard deviation. There is a negative linear correlation between concentration and RSD on logarithmic plots

---

## References

1. C. Li, H. Hu, M.-F. Yang, Z.-Y. Pei, Q. Zhou, X. Ren, B. Liu, D. Liu, X. Zeng, G. Zhang, H. Zhang, J. Liu, Q. Wang, X. Deng, C. Xiao, Y. Yao, D. Xue, W. Zuo, Y. Su, W. Wen and Z. Ouyang, *Nati. Scie. Revi.*, 2021, DOI: 10.1093/nsr/nwab188.
2. Q.-L. Li, Q. Zhou, Y. Liu, Z. Xiao, Y. Lin, J.-H. Li, H.-X. Ma, G.-Q. Tang, S. Guo, X. Tang, J.-Y. Yuan, J. Li, F.-Y. Wu, Z. Ouyang, C. Li and X.-H. Li, *Nature*, 2021, DOI: 10.1038/s41586-021-04100-2.
3. H.-C. Tian, H. Wang, Y. Chen, W. Yang, Q. Zhou, C. Zhang, H.-L. Lin, C. Huang, S.-T. Wu, L.-H. Jia, L. Xu, D. Zhang, X.-G. Li, R. Chang, Y.-H. Yang, L.-W. Xie, D.-P. Zhang, G.-L. Zhang, S.-H. Yang and F.-Y. Wu, *Nature*, 2021, DOI: 10.1038/s41586-021-04119-5.
4. S. Hu, H. He, J. Ji, Y. Lin, H. Hui, M. Anand, R. Tartèse, Y. Yan, J. Hao, R. Li, L. Gu, Q. Guo, H. He and Z. Ouyang, *Nature*, 2021, DOI: 10.1038/s41586-021-04107-9.
5. F.-Y. Wu, Q.-L. Li, Y. Chen, S. Hu, Z.-Y. Yue, Q. Zhou, H. Wang, W. Yang, H.-C. Tian, C. Zhang, J.-H. Li, L.-X. Li, H.-J. Hui, C.-L. Li, Y.-T. Lin, X.-H. Li and J. W. Delano, *Annual Review of Earth and Planetary Sciences*, 2024, DOI: <https://doi.org/10.1146/annurev-earth-040722-100453>.
6. X. Che, A. Nemchin, D. Liu, T. Long, C. Wang, M. D. Norman, K. H. Joy, R. Tartese, J. Head, B. Jolliff, J. F. Snape, C. R. Neal, M. J. Whitehouse, C. Crow, G. Benedix, F. Jourdan, Z. Yang, C. Yang, J. Liu, S. Xie, Z. Bao, R. Fan, D. Li, Z. Li and S. G. Webb, *Science*, 2021, **0**, eabl7957.
7. K. P. Jochum, U. Nohl, K. Herwig, E. Lammel, B. Stoll and A. W. Hofmann, *Geostand. Geoanal. Res.*, 2005, **29**, 333-338.
8. D.-S. Xue, B.-X. Su, D.-P. Zhang, Y.-H. Liu, J.-J. Guo, Q. Guo, J.-F. Sun and S.-Y. Zhang, *J. Anal. At. Spectrom.*, 2020, **35**, 2826-2833.
9. S. Wu, G. Wörner, K. P. Jochum, B. Stoll, K. Simon and A. Kronz, *Geostand. Geoanal. Res.*, 2019, **43**, 567-584.
10. S. Wu, Y. Yang, K. P. Jochum, R. L. Romer, J. Glodny, I. P. Savov, S. Agostini, J. C. M. De Hoog, S. T. M. Peters, A. Kronz, C. Zhang, Z. Bao, X. Wang, Y. Li, G. Tang, L. Feng, H. Yu, Z. Li, Z. Le, J. Lin, Y. Zeng, C. Xu, Y. Wang, Z. Cui, L. Deng, J. Xiao, Y. Liu, D. Xue, Z. Di, L. Jia, H. Wang, L. Xu, C. Huang, L. Xie, A. Pack, G. Wörner, M. He, C. Li, H. Yuan, F. Huang, Q. Li, J. Yang, X. Li and F. Wu, *Geostand. Geoanal. Res.*, 2021, **45**, 719-745.
11. C. Paton, J. Hellstrom, B. Paul, J. Woodhead and J. Hergt. 2011. *J. Anal. At. Spectrom.*, 26(12), 2508-2518.
12. S. Wu, C. Huang, L. Xie, Y. Yang, and J. Yang. 2020. *Chinese Journal of Analytical Chemistry*, 46(10), 1628-1636..
13. T. Pettke, F. Oberli, A. Audétat, M. Guillong, A. C. Simon, J. J. Hanley and L. M. Klemm, *Ore Geol. Revi.*, 2012, **44**, 10-38.
